# Supplementary material
Source: PubMed Central journal article supplement (PMC2174204)
Supplement: NIHMS35719-supplement-01.pdf [file NIHMS35719-supplement-01.pdf]

## Supplemental Data

## Short Article

Increased Energy Expenditure, Dietary Fat Wasting,  
and Resistance to Diet-Induced Obesity

## in Mice Lacking Renin

Nobuyuki Takahashi, Feng Li, Kunjie Hua, Jianbei Deng, Chih-Hong Wang,  
Robert R. Bowers, Timothy J. Bartness, Hyung-Suk Kim, and Joyce B. Harp

Table S1. Body Composition, Tissue Weights, and Body Length of 10-Month-Old Mice

|                                | regular chow |                             | high-fat diet            |                             |
|--------------------------------|--------------|-----------------------------|--------------------------|-----------------------------|
|                                | WT           | <i>Ren1c</i> <sup>-/-</sup> | WT                       | <i>Ren1c</i> <sup>-/-</sup> |
| body weight (g)                | 36.4 ± 1.3   | 29.5 ± 0.6 <sup>c</sup>     | 51.7 ± 3.2 <sup>a</sup>  | 29.7 ± 0.5 <sup>d</sup>     |
| body length (cm)               | 9.8 ± 0.1    | 9.5 ± 0.2                   | 9.7 ± 0.2                | 9.5 ± 0.3                   |
| lean tissue (g)                | 24.6 ± 0.9   | 25.7 ± 1.2                  | 32.1 ± 0.8 <sup>a</sup>  | 25.4 ± 0.6 <sup>d</sup>     |
| body fat (g)                   | 10.7 ± 1.2   | 5.1 ± 0.7 <sup>c</sup>      | 20.8 ± 0.8 <sup>a</sup>  | 5.5 ± 0.5 <sup>d</sup>      |
| % body fat                     | 29.3 ± 2.8   | 17.2 ± 2.4 <sup>c</sup>     | 40.2 ± 0.8 <sup>a</sup>  | 19.1 ± 1.2 <sup>d</sup>     |
| IWAT (g)                       | 1.03 ± 0.18  | 0.23 ± 0.10 <sup>c</sup>    | 1.48 ± 0.19 <sup>a</sup> | 0.29 ± 0.03 <sup>d</sup>    |
| GWAT (g)                       | 2.70 ± 0.33  | 0.56 ± 0.29 <sup>c</sup>    | 3.95 ± 0.21 <sup>a</sup> | 0.98 ± 0.01 <sup>d</sup>    |
| RWAT (g)                       | 0.82 ± 0.11  | 0.17 ± 0.11 <sup>c</sup>    | 1.43 ± 0.29 <sup>a</sup> | 0.28 ± 0.03 <sup>d</sup>    |
| BAT (g)                        | 0.30 ± 0.02  | 0.14 ± 0.02 <sup>c</sup>    | 0.32 ± 0.05              | 0.10 ± 0.01 <sup>d</sup>    |
| heart (g)                      | 0.17 ± 0.01  | 0.17 ± 0.01                 | 0.17 ± 0.02              | 0.14 ± 0.02                 |
| liver (g)                      | 1.39 ± 0.13  | 1.28 ± 0.05                 | 3.80 ± 0.60 <sup>a</sup> | 1.08 ± 0.02 <sup>d</sup>    |
| fat (g/g liver)                | 0.16 ± 0.01  | 0.15 ± 0.01                 | 0.94 ± 0.07 <sup>a</sup> | 0.44 ± 0.07 <sup>bd</sup>   |
| fat (g/g soleus)               | ND           | ND                          | 0.33 ± 0.13              | 0.32 ± 0.17                 |
| pancreas (g)                   | ND           | ND                          | 0.23 ± 0.02              | 0.22 ± 0.02                 |
| small intestine<br>length (cm) | ND           | ND                          | 34.0 ± 0.8               | 33.6 ± 1.0                  |

Body length: nose to rump length, IWAT, inguinal white adipose tissue; GWAT, gonadal WAT; RWAT, retroperitoneal WAT; BAT, interscapular brown adipose tissue. Body fat was measured by dual-energy X-ray absorptiometry. <sup>a, c</sup>*p* < 0.05 vs. WT on regular chow; <sup>b</sup>*p* < 0.05 vs. *Ren1c*<sup>-/-</sup> on regular chow; <sup>d</sup>*p* < 0.05 vs. WT on a high-fat diet. Two month old males were fed either regular chow or a high-fat diet for 8 months. n = 6~10. ND, not determined.

**Table S2. Metabolic Studies by Oxymax**

|                                          | WT          | <i>Ren1c</i> <sup>-/-</sup> | p value |
|------------------------------------------|-------------|-----------------------------|---------|
| body weight (g)                          | 26.1 ± 1.4  | 21.5 ± 0.9                  | 0.016   |
| lean body mass (g)                       | 18.7 ± 0.6  | 18.0 ± 0.7                  | 0.482   |
| fat body mass (g)                        | 6.3 ± 0.7   | 2.3 ± 0.2                   | 0.001   |
| total O2 consumption (ml/kg/h)           | 5256 ± 290  | 6868 ± 333                  | 0.002   |
| resting O2 consumption (ml/kg/h)         | 3758 ± 293  | 5522 ± 313                  | 0.001   |
| total heat generation (kcal/kg/d)        | 629 ± 35    | 801 ± 39                    | 0.005   |
| resting heat generation (kcal/kg/d)      | 448 ± 35    | 634 ± 34                    | 0.002   |
| total O2 consumption (ml/kg lean/h)      | 7139 ± 268  | 8247 ± 339                  | 0.022   |
| resting O2 consumption (ml/kg lean/h)    | 5105 ± 303  | 6609 ± 345                  | 0.006   |
| total heat generation (kcal/kg lean/d)   | 854 ± 32    | 961 ± 39                    | 0.048   |
| resting heat generation (kcal/kg lean/d) | 608 ± 36    | 758 ± 36                    | 0.011   |
| respiratory quotient (RQ)                | 0.95 ± 0.03 | 0.85 ± 0.02                 | 0.020   |
| horizontal activity                      | 358 ± 38    | 372 ± 49                    | 0.826   |
| ambulation                               | 194 ± 25    | 202 ± 31                    | 0.856   |
| vertical activity                        | 35 ± 11     | 33 ± 12                     | 0.896   |

Animals were 3~5 months old and fed a high-fat diet for 2 weeks before the measurements. Lean and fat body mass were measured using MRI. n = 9 each.

**Table S3. Gene Expression of Uncoupling Proteins**

|                                    | WT       | <i>Ren1c</i> <sup>-/-</sup> | p value |
|------------------------------------|----------|-----------------------------|---------|
| UCP1, brown adipose tissue         | 100 ± 25 | 1620 ± 320                  | 0.002   |
| UCP2, gonadal white adipose tissue | 100 ± 10 | 153 ± 15                    | 0.019   |
| UCP3, brown adipose tissue         | 100 ± 11 | 135 ± 11                    | 0.043   |
| UCP3, skeletal muscle              | 100 ± 32 | 435 ± 128                   | 0.046   |

Animals were 3~5-month-old males fed a high-fat diet for 4 weeks. n = 6~8 each.

**Table S4. Catecholamines**

|                        | WT         | <i>Ren1c</i> <sup>-/-</sup> |
|------------------------|------------|-----------------------------|
| NE-plasma, ng/ml       | 1.2 ± 0.4  | 1.0 ± 0.2                   |
| Epi-plasma, ng/ml      | 1.2 ± 0.3  | 1.1 ± 0.3                   |
| NE- Heart, ng/heart/hr | 23.0 ± 1.9 | 21.0 ± 1.8                  |
| NE- GWAT, ng/hr/mgRNA  | 124 ± 17   | 136 ± 12                    |
| NE- IWAT, ng/hr/mgRNA  | 139 ± 20   | 126 ± 7                     |
| NE- BAT, ng/hr/mgRNA   | 1540 ± 160 | 1890 ± 180                  |

Synthesis of norepinephrine (NE) and epinephrine (Epi) was calculated as described in materials and methods. The amount of NE in adipose tissues was normalized by the amount of total RNA, which is proportional to the number of cells (O'Brien et al., 1996). n = 8 each. Animals were 4~6-month-old males fed a high-fat diet for 4 weeks.

O'Brien, S. N., Mantzke, K. A., Kilgore, M. W., and Price, T. M. (1996). Relationship between adipose stromal-vascular cells and adipocytes in human adipose tissue. *Anal Quant Cytol Histol* 18, 137-143.

**Table S5. Plasma Levels of Thyroid Hormones**

|            | WT           | <i>Ren1c-/-</i> | p value |
|------------|--------------|-----------------|---------|
| T3 (ng/dl) | 113.8 ± 20.0 | 67.8 ± 6.3      | 0.05    |
| T4 (μg/dl) | 16.6 ± 3.0   | 7.8 ± 2.4       | 0.03    |

Animals were 3~5-month-old males fed a high-fat diet for 4 weeks. n = 8 each.

**Table S6. Bile Acid Contents in the Liver and Intestine**

|                        | WT         | <i>Ren1c-/-</i> |
|------------------------|------------|-----------------|
| liver (μmol/mouse)     | 3.5 ± 0.6  | 4.0 ± 0.8       |
| intestine (μmol/mouse) | 11.3 ± 1.0 | 11.5 ± 0.9      |

Animals were 3~5-month-old males fed a high-fat diet for 4 weeks. n = 8 each.

**Table S7. Expression of Adipogenic Genes in Gonadal WAT**

|           | WT       | <i>Ren1c-/-</i> |
|-----------|----------|-----------------|
| cyclin D1 | 100 ± 22 | 157 ± 37        |
| C/EBPβ    | 100 ± 26 | 101 ± 25        |
| C/EBPα    | 100 ± 11 | 85 ± 18         |
| PPARγ     | 100 ± 12 | 108 ± 15        |
| SREBP1a   | 100 ± 12 | 108 ± 15        |
| SREBP1c   | 100 ± 13 | 126 ± 17        |
| DGAT2     | 100 ± 5  | 98 ± 4          |

Values are expressed as % WT. Animals were 3~5-month-old males fed a high-fat diet for 4 weeks. n = 6~8.

**Table S8. Plasma Biochemistry of Insulin Sensitivity and Lipid Metabolism**

|                           | Regular Chow |                         | High-Fat Diet             |                           |
|---------------------------|--------------|-------------------------|---------------------------|---------------------------|
|                           | WT           | <i>Ren1c-/-</i>         | WT                        | <i>Ren1c-/-</i>           |
| glucose (mg/dl)           | 148.6 ± 13.1 | 134.2 ± 8.7             | 174.5 ± 15.0              | 121.5 ± 17.4 <sup>d</sup> |
| insulin (ng/ml)           | 1.1 ± 0.4    | 0.7 ± 0.3               | 3.8 ± 0.8 <sup>a</sup>    | 0.5 ± 0.2 <sup>d</sup>    |
| triglyceride (mg/dl)      | 79.7 ± 1.8   | 84.3 ± 2.8              | 97.3 ± 4.8 <sup>a</sup>   | 89.1 ± 4.7                |
| total cholesterol (mg/dl) | 26.3 ± 1.9   | 28.8 ± 2.3              | 58.3 ± 2.8 <sup>a</sup>   | 57.6 ± 2.1 <sup>b</sup>   |
| free fatty acid (mM)      | 0.87 ± 0.05  | 0.72 ± 0.02             | 0.50 ± 0.03 <sup>a</sup>  | 0.43 ± 0.03 <sup>b</sup>  |
| adiponectin (μg/ml)       | 20.7 ± 1.3   | 29.5 ± 0.8 <sup>c</sup> | 26.4 ± 3.4                | 75.4 ± 3.9 <sup>bd</sup>  |
| leptin (ng/ml)            | 35.1 ± 5.1   | 24.3 ± 1.8              | 107.2 ± 12.5 <sup>a</sup> | 36.4 ± 4.5 <sup>bd</sup>  |

Animals are the same as those in Table 1, and were 10-month-old males fed either regular chow or a high-fat diet for 8 months. Blood was drawn after 4 hrs of fasting. n = 6~10. <sup>a, c</sup>p < 0.05 vs. WT on regular chow; <sup>b</sup>p < 0.05 vs. *Ren1c-/-* on regular chow; <sup>d</sup>p < 0.05 vs. WT on a high-fat diet.

**Table S9. Primers and Probes for qRT-PCR**

---

|                   |                                                                                                                                                                               |
|-------------------|-------------------------------------------------------------------------------------------------------------------------------------------------------------------------------|
| adiponectin:      | 5'-ATC CTG GCC ACA ATG GCA CA-3'<br>5'-CAA GAA GAC CTG CAT CTC CT-3'                                                                                                          |
| colipase          | 5'-FAM-CCG TGA TGG CAG AGA TGG CAC TCC T-TAMRA-3'<br>5'-ACA CAC AAG GCC ATG GAG AA-3'<br>5'-TCA CAG GGA CAC CGG TAG T-3'                                                      |
| cyclin D1:        | 5'-FAM-CGA GTG CTC CCC AAA GAC CCT CTA-TAMRA-3'<br>5'-CTA CAC TGA CAA CTC TAT CCG-3'<br>5'-TGA AAT CGT GGG GAG TCA TG-3'                                                      |
| C/EBP $\alpha$ :  | 5'-FAM- TGC AAA TGG AAC TGC TTC TGG TGA ACA-TAMRA-3'<br>5'-CAG CAA CGA GTA CCG GGT A-3'<br>5'-TGC GTC TCC ACG TTG CGT T-3'                                                    |
| C/EBP $\beta$ :   | 5'-FAM- CAA CAA CAT CGC G/TGT GCG CAA GAG CC-TAMRA-3'<br>5'-CTG AGC GAC GAG TAC AAG AT-3'<br>5'-GCG TCT CCA GGT TCG GCA-3'                                                    |
| DGAT1:            | 5'-FAM- CAA CAA CAT CGC G/TGT GCG CAA GAG CC-TAMRA-3'<br>5'-CCG TGT TTG CTC TGG CAT C-3'<br>5'-TGA CCT TCT TCC CTG TAG GAG-3'                                                 |
| DGAT2             | 5'-FAM- TCC TAC CGG GAT GTC AAC CTG TGG-TAMRA-3'<br>5'-AGC TGT GCT CTA CTT CAC CT-3'<br>5'-ACA CGG CCC AGT TT? GCA-3'                                                         |
| HMGCoA synthase 2 | 5'-FAM-CCA CTG CGA TCT CCT GCC ACC TT--TAMRA-3'<br>5'-CTG GCC TCA CTT CTC TCT CA-3'<br>3'-AAG CCT GAG CCG TAG GAG AA-3'                                                       |
| Hprt:             | 5'-FAM-CTC TGC CCA AGA ATT GGC TGG CTC C-TAMRA-3'<br>5'-GGA CTG ATT ATG GAC AGG AC-3'<br>5'-CAG AGG GCC ACA ATG TGA T-3'                                                      |
| leptin:           | 5'-TET-CCT CCC ATC TCC TTC ATG ACA TCT CG-TAMRA-3'<br>5'-AGC TGC AAG GCT CTG CTG-3'<br>5'-CGA GTT GTT ATA GCC TCG GA-3'                                                       |
| pancreatic lipase | 5'-FAM- TAG TCC CCA GAC GTG AGG AAC ACA G-TAMRA-3'<br>5' GCC AGG ATG CCA GAA GAA TA-3'<br>5'-ACA GGC AGC AAA GTT TCG AG-3'                                                    |
| PPAR $\gamma$ :   | 5'-FAM-CTT CCC AGA TCC CGT CGA TGT CAA C-TAMRA-3'<br>5'-AGA CAT GAG CCT TCA CCC C-3'<br>5'-AGA AGG AAC ACG TTG TCA GC-3'                                                      |
| SREBP1a:          | 5'-FAM- CAA GTC CTT GTA GAT CTC CTG GAG C-TAMRA-3'<br>5'-AGA TGT GCG AAC TGG ACA CA-3'<br>5'-TGT CTC ACC CCC AGC ATA G-3'                                                     |
| SREBP1c:          | 5'-FAM- AGA CAT GCT CCA GCT CAT CAA CAA CCA A-TAMRA-3'<br>F: ACG GAG CCA TGG ATT GCA C<br>R: TGT CTC ACC CCC AGC ATA G                                                        |
| UCP1:             | 5'-FAM- AGA CAT GCT CCA GCT CAT CAA CAA CCA A-TAMRA-3'<br>5'- TAT AGC CAC CAC AGA AAG CTT-3'<br>5'-ACC AGC TCT GTA CAA TTG ATG-3'                                             |
| UCP2:             | 5'-FAM- CGA CCC CTA ATC TAA TGA GAA ATG TCA-TAMRA-3'<br>5'-ACA AGA CCA TTG CAC GAG AG-3'<br>5'-ACC AGC TCA GCA CAG TTG A-3'                                                   |
| UCP3:             | 5'-FAM- CTC CCA ATG TTG CCC GTA ATG CCA-TAMRA-3'<br>5'-ATC GCC AGG GAG GAA GGA G-3'<br>5'-CAC CAT CTC AGC ACA GTT GA-3'<br>5'-FAM- TGG CCC AAC ATC ACA AGA AAT GCC A-TAMRA-3' |

---

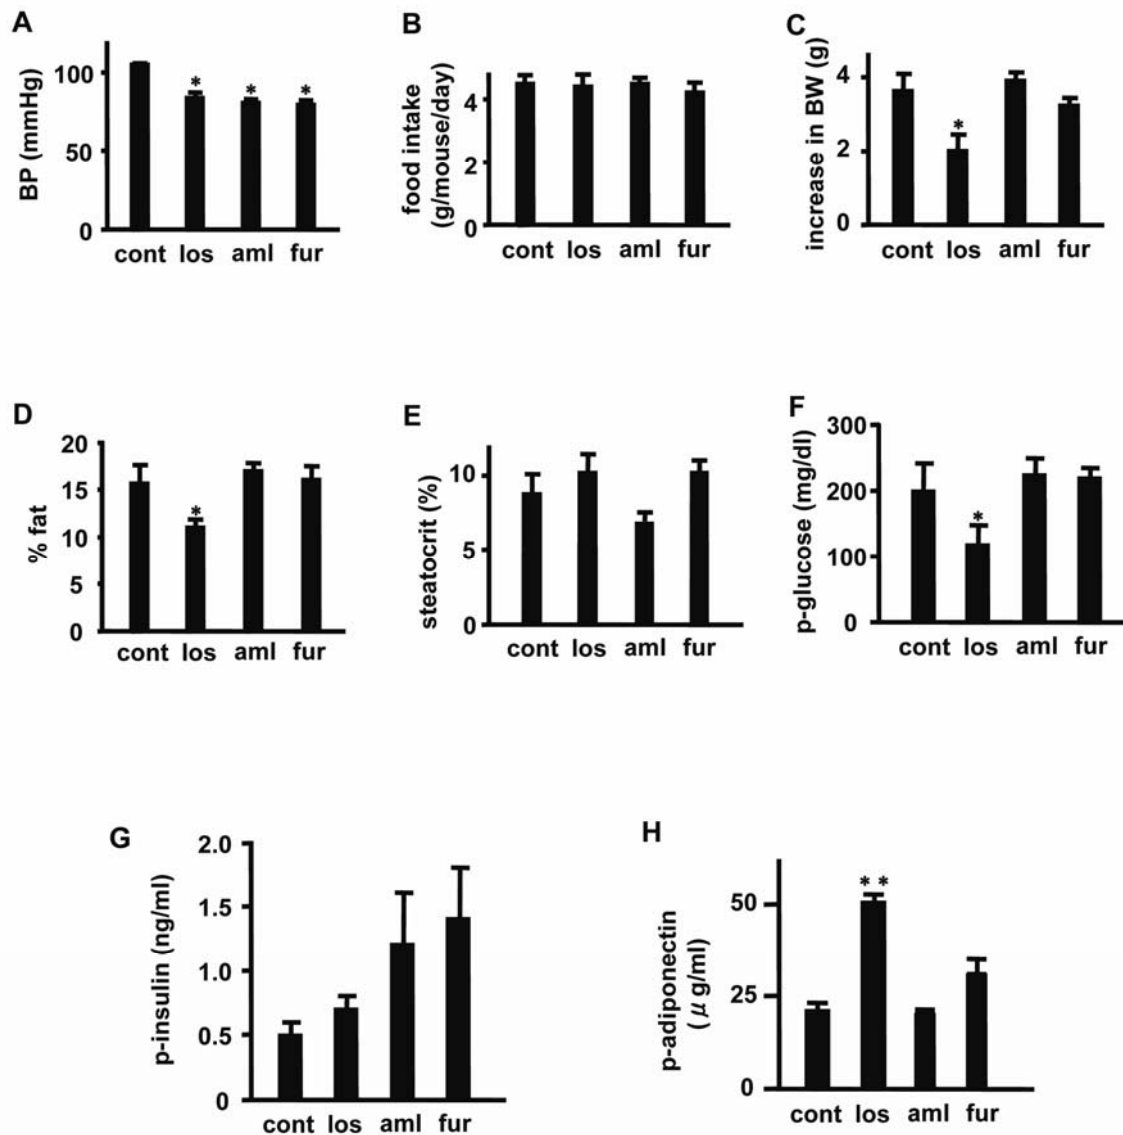

**Figure S1. Losartan Replicates the Metabolic Phenotype of the *Ren1c*<sup>-/-</sup> Mice, but Amlodipine and Furosemide Do Not**

Male WT mice 3 months of age were fed a high-fat diet with losartan (los) 0.45 g/l in drinking water, amlodipine (aml) 60 mg/kg food, furosemide (fur) 0.1 g/l in drinking water, or without drugs (cont). Blood pressure (A), food intake (B), increase in body weight (C), % body fat (D), fecal acid steatocrit (E), plasma glucose (F), plasma insulin (G), plasma adiponectin (H). Data were obtained 2 weeks after the treatment.  $n \geq 5$  each. \* $p < 0.05$ , \*\* $p < 0.0001$  compared to control. Error bars represent  $\pm$  SEM in all panels.
